# Supplementary material for: Skin bacterial diversity is higher on lizards than sympatric frogs in tropical Australia
Source: PeerJ. 2018 Nov 14;6:e5960. doi: 10.7717/peerj.5960 (PMC6240339; doi:10.7717/peerj.5960)
Supplement: Table S1 — Contains one sheet per set of pairwise analysis results: OTU richness, Shannon diversity, Phylogenetic diversity, and PERMANOVAs. Adjusted p-value is provided for each pairwise comparison. [file peerj-06-5960-s003.xlsx]

## Sheet: OTU Richness
Comparison	Dependent variable	Test	Z	P unadjusted	P adjusted	P adjustment
Carlia gracilis v Litoria rubella	OTU Richness	Dunn's test	5.00311	5.64141e-07	6.76969e-06	Benjamini Hochberg
Carlia gracilis v Litoria caerulea	OTU Richness	Dunn's test	4.37825	1.19635e-05	7.1781e-05	Benjamini Hochberg
Carlia gracilis v Litoria rothii	OTU Richness	Dunn's test	3.80048	0.000144418	0.000577672	Benjamini Hochberg
Carlia gracilis v Rhinella marina	OTU Richness	Dunn's test	3.84755	0.000119303	0.000536862	Benjamini Hochberg
Hemidactylus frenatus v Limnodynastes convexiusculus	OTU Richness	Dunn's test	-2.21267	0.0269208	0.0484574	Benjamini Hochberg
Hemidactylus frenatus v Litoria rubella	OTU Richness	Dunn's test	3.6892	0.000224959	0.000809852	Benjamini Hochberg
Hemidactylus frenatus v Litoria caerulea	OTU Richness	Dunn's test	3.06435	0.00218145	0.00604093	Benjamini Hochberg
Hemidactylus frenatus v Litoria rothii	OTU Richness	Dunn's test	2.48657	0.012898	0.0244383	Benjamini Hochberg
Hemidactylus frenatus v Rhinella marina	OTU Richness	Dunn's test	2.53365	0.0112881	0.0239042	Benjamini Hochberg
Limnodynastes convexiusculus v Litoria rubella	OTU Richness	Dunn's test	5.90187	3.59412e-09	1.29388e-07	Benjamini Hochberg
Limnodynastes convexiusculus v Litoria caerulea	OTU Richness	Dunn's test	5.27701	1.31306e-07	2.36351e-06	Benjamini Hochberg
Limnodynastes convexiusculus v Litoria rothii	OTU Richness	Dunn's test	4.69924	2.61134e-06	1.88016e-05	Benjamini Hochberg
Limnodynastes convexiusculus v Litoria nasuta	OTU Richness	Dunn's test	2.78616	0.00533365	0.0120007	Benjamini Hochberg
Limnodynastes convexiusculus v Rhinella marina	OTU Richness	Dunn's test	4.74632	2.07155e-06	1.86439e-05	Benjamini Hochberg
Litoria caerulea v Litoria nasuta	OTU Richness	Dunn's test	-2.49085	0.0127437	0.0254874	Benjamini Hochberg
Litoria caerulea v Lophognatus temporalis	OTU Richness	Dunn's test	-3.48805	0.000486557	0.00159237	Benjamini Hochberg
Litoria nasuta v Litoria rubella	OTU Richness	Dunn's test	3.11571	0.00183505	0.00550515	Benjamini Hochberg
Litoria rothii v Lophognatus temporalis	OTU Richness	Dunn's test	-2.91028	0.00361111	0.00866666	Benjamini Hochberg
Litoria rubella v Lophognatus temporalis	OTU Richness	Dunn's test	-4.1129	3.90714e-05	0.000200938	Benjamini Hochberg
Lophognatus temporalis v Rhinella marina	OTU Richness	Dunn's test	2.95735	0.00310293	0.00797895	Benjamini Hochberg
Litoria nasuta v Rhinella marina	OTU Richness	Dunn's test	1.96016	0.0499776	0.0856758	Benjamini Hochberg
Litoria nasuta v Litoria rothii	OTU Richness	Dunn's test	1.91308	0.0557381	0.0912078	Benjamini Hochberg
Carlia gracilis v Litoria nasuta	OTU Richness	Dunn's test	1.8874	0.0591067	0.0925148	Benjamini Hochberg
Limnodynastes convexiusculus v Lophognatus temporalis	OTU Richness	Dunn's test	1.78896	0.0736207	0.110431	Benjamini Hochberg
Carlia gracilis v Hemidactylus frenatus	OTU Richness	Dunn's test	1.3139	0.188879	0.271985	Benjamini Hochberg
Litoria rothii v Litoria rubella	OTU Richness	Dunn's test	1.20263	0.22912	0.317243	Benjamini Hochberg
Litoria rubella v Rhinella marina	OTU Richness	Dunn's test	-1.15555	0.247865	0.330487	Benjamini Hochberg
Litoria nasuta v Lophognatus temporalis	OTU Richness	Dunn's test	-0.997197	0.318669	0.409717	Benjamini Hochberg
Carlia gracilis v Lophognatus temporalis	OTU Richness	Dunn's test	0.890202	0.373358	0.448029	Benjamini Hochberg
Carlia gracilis v Limnodynastes convexiusculus	OTU Richness	Dunn's test	-0.898761	0.36878	0.457796	Benjamini Hochberg
Hemidactylus frenatus v Litoria nasuta	OTU Richness	Dunn's test	0.573495	0.566309	0.617792	Benjamini Hochberg
Litoria caerulea v Litoria rubella	OTU Richness	Dunn's test	0.624853	0.532067	0.617885	Benjamini Hochberg
Litoria caerulea v Rhinella marina	OTU Richness	Dunn's test	-0.530697	0.595629	0.630666	Benjamini Hochberg
Litoria caerulea v Litoria rothii	OTU Richness	Dunn's test	-0.577775	0.563416	0.633843	Benjamini Hochberg
Hemidactylus frenatus v Lophognatus temporalis	OTU Richness	Dunn's test	-0.423702	0.671783	0.690977	Benjamini Hochberg
Litoria rothii v Rhinella marina	OTU Richness	Dunn's test	0.047078	0.962451	0.962451	Benjamini Hochberg

## Sheet: Shannon Diversity
Comparison	Dependent variable	Test	Z	P unadjusted	P adjusted	P adjustment
Carlia gracilis v Litoria caerulea	Shannon's diversity	Dunn's test	5.34951	8.81946e-08	1.5875e-06	Benjamini Hochberg
Carlia gracilis v Litoria nasuta	Shannon's diversity	Dunn's test	2.56776	0.0102357	0.0245657	Benjamini Hochberg
Carlia gracilis v Litoria rubella	Shannon's diversity	Dunn's test	3.34665	0.000817941	0.00327176	Benjamini Hochberg
Carlia gracilis v Rhinella marina	Shannon's diversity	Dunn's test	3.8602	0.000113293	0.000679755	Benjamini Hochberg
Hemidactylus frenatus v Litoria caerulea	Shannon's diversity	Dunn's test	4.14266	3.43304e-05	0.000308974	Benjamini Hochberg
Hemidactylus frenatus v Rhinella marina	Shannon's diversity	Dunn's test	2.65336	0.0079696	0.0204933	Benjamini Hochberg
Limnodynastes convexiusculus v Litoria caerulea	Shannon's diversity	Dunn's test	5.57205	2.51765e-08	9.06356e-07	Benjamini Hochberg
Limnodynastes convexiusculus v Litoria nasuta	Shannon's diversity	Dunn's test	2.7903	0.00526588	0.0157976	Benjamini Hochberg
Limnodynastes convexiusculus v Litoria rothii	Shannon's diversity	Dunn's test	2.40514	0.0161664	0.0363743	Benjamini Hochberg
Limnodynastes convexiusculus v Litoria rubella	Shannon's diversity	Dunn's test	3.56919	0.000358086	0.00161139	Benjamini Hochberg
Limnodynastes convexiusculus v Rhinella marina	Shannon's diversity	Dunn's test	4.08274	4.45072e-05	0.000320452	Benjamini Hochberg
Litoria caerulea v Litoria nasuta	Shannon's diversity	Dunn's test	-2.78174	0.00540678	0.0149726	Benjamini Hochberg
Litoria caerulea v Litoria rothii	Shannon's diversity	Dunn's test	-3.16691	0.00154069	0.00554649	Benjamini Hochberg
Litoria caerulea v Lophognatus temporalis	Shannon's diversity	Dunn's test	-5.07561	3.86252e-07	4.63502e-06	Benjamini Hochberg
Litoria nasuta v Lophognatus temporalis	Shannon's diversity	Dunn's test	-2.29387	0.0217981	0.0461606	Benjamini Hochberg
Litoria rubella v Lophognatus temporalis	Shannon's diversity	Dunn's test	-3.07276	0.00212092	0.00694118	Benjamini Hochberg
Lophognatus temporalis v Rhinella marina	Shannon's diversity	Dunn's test	3.58631	0.000335392	0.00172487	Benjamini Hochberg
Carlia gracilis v Litoria rothii	Shannon's diversity	Dunn's test	2.1826	0.0290654	0.0581308	Benjamini Hochberg
Hemidactylus frenatus v Litoria rubella	Shannon's diversity	Dunn's test	2.1398	0.0323707	0.061334	Benjamini Hochberg
Litoria caerulea v Litoria rubella	Shannon's diversity	Dunn's test	-2.00286	0.0451928	0.0813471	Benjamini Hochberg
Litoria rothii v Lophognatus temporalis	Shannon's diversity	Dunn's test	-1.9087	0.0563003	0.0965148	Benjamini Hochberg
Litoria rothii v Rhinella marina	Shannon's diversity	Dunn's test	1.67761	0.0934242	0.152876	Benjamini Hochberg
Litoria caerulea v Rhinella marina	Shannon's diversity	Dunn's test	-1.4893	0.136408	0.213508	Benjamini Hochberg
Hemidactylus frenatus v Limnodynastes convexiusculus	Shannon's diversity	Dunn's test	-1.42939	0.152893	0.229339	Benjamini Hochberg
Hemidactylus frenatus v Litoria nasuta	Shannon's diversity	Dunn's test	1.36091	0.173541	0.249899	Benjamini Hochberg
Litoria nasuta v Rhinella marina	Shannon's diversity	Dunn's test	1.29244	0.196205	0.271668	Benjamini Hochberg
Carlia gracilis v Hemidactylus frenatus	Shannon's diversity	Dunn's test	1.20685	0.227491	0.303321	Benjamini Hochberg
Litoria rothii v Litoria rubella	Shannon's diversity	Dunn's test	1.16405	0.244403	0.314232	Benjamini Hochberg
Hemidactylus frenatus v Litoria rothii	Shannon's diversity	Dunn's test	0.97575	0.329188	0.408648	Benjamini Hochberg
Hemidactylus frenatus v Lophognatus temporalis	Shannon's diversity	Dunn's test	-0.932954	0.350844	0.421013	Benjamini Hochberg
Litoria nasuta v Litoria rubella	Shannon's diversity	Dunn's test	0.778888	0.436046	0.506376	Benjamini Hochberg
Limnodynastes convexiusculus v Lophognatus temporalis	Shannon's diversity	Dunn's test	0.496434	0.619588	0.675914	Benjamini Hochberg
Litoria rubella v Rhinella marina	Shannon's diversity	Dunn's test	0.513553	0.607565	0.68351	Benjamini Hochberg
Litoria nasuta v Litoria rothii	Shannon's diversity	Dunn's test	-0.385164	0.700116	0.741299	Benjamini Hochberg
Carlia gracilis v Lophognatus temporalis	Shannon's diversity	Dunn's test	0.273895	0.784165	0.80657	Benjamini Hochberg
Carlia gracilis v Limnodynastes convexiusculus	Shannon's diversity	Dunn's test	-0.22254	0.823894	0.823894	Benjamini Hochberg

## Sheet: Phylogenetic Diversity
Comparison	Dependent variable	Test	Z	P unadjusted	P adjusted	P adjustment
Carlia gracilis v Litoria caerulea	Faith's phylogenetic diversity	Dunn's test	4.04851	5.15456e-05	0.000265091	Benjamini Hochberg
Carlia gracilis v Litoria rothii	Faith's phylogenetic diversity	Dunn's test	3.99715	6.41094e-05	0.000288492	Benjamini Hochberg
Carlia gracilis v Litoria rubella	Faith's phylogenetic diversity	Dunn's test	5.00714	5.52454e-07	9.94417e-06	Benjamini Hochberg
Carlia gracilis v Rhinella marina	Faith's phylogenetic diversity	Dunn's test	3.58631	0.000335392	0.00120741	Benjamini Hochberg
Hemidactylus frenatus v Litoria caerulea	Faith's phylogenetic diversity	Dunn's test	2.95293	0.00314776	0.00809424	Benjamini Hochberg
Hemidactylus frenatus v Litoria rothii	Faith's phylogenetic diversity	Dunn's test	2.90157	0.00371295	0.00835414	Benjamini Hochberg
Hemidactylus frenatus v Litoria rubella	Faith's phylogenetic diversity	Dunn's test	3.91156	9.17023e-05	0.000366809	Benjamini Hochberg
Hemidactylus frenatus v Rhinella marina	Faith's phylogenetic diversity	Dunn's test	2.49073	0.0127481	0.0254962	Benjamini Hochberg
Limnodynastes convexiusculus v Litoria caerulea	Faith's phylogenetic diversity	Dunn's test	4.87875	1.06761e-06	1.28113e-05	Benjamini Hochberg
Limnodynastes convexiusculus v Litoria nasuta	Faith's phylogenetic diversity	Dunn's test	2.58488	0.00974125	0.0206285	Benjamini Hochberg
Limnodynastes convexiusculus v Litoria rothii	Faith's phylogenetic diversity	Dunn's test	4.82739	1.38331e-06	1.24498e-05	Benjamini Hochberg
Limnodynastes convexiusculus v Litoria rubella	Faith's phylogenetic diversity	Dunn's test	5.83738	5.30277e-09	1.909e-07	Benjamini Hochberg
Limnodynastes convexiusculus v Rhinella marina	Faith's phylogenetic diversity	Dunn's test	4.41655	1.00288e-05	7.22071e-05	Benjamini Hochberg
Litoria caerulea v Litoria nasuta	Faith's phylogenetic diversity	Dunn's test	-2.29387	0.0217981	0.0413016	Benjamini Hochberg
Litoria caerulea v Lophognatus temporalis	Faith's phylogenetic diversity	Dunn's test	-3.37233	0.000745354	0.00243934	Benjamini Hochberg
Litoria nasuta v Litoria rothii	Faith's phylogenetic diversity	Dunn's test	2.24251	0.0249282	0.0448708	Benjamini Hochberg
Litoria nasuta v Litoria rubella	Faith's phylogenetic diversity	Dunn's test	3.2525	0.00114395	0.00316785	Benjamini Hochberg
Litoria rothii v Lophognatus temporalis	Faith's phylogenetic diversity	Dunn's test	-3.32097	0.000897041	0.00269112	Benjamini Hochberg
Litoria rubella v Lophognatus temporalis	Faith's phylogenetic diversity	Dunn's test	-4.33096	1.4846e-05	8.90763e-05	Benjamini Hochberg
Lophognatus temporalis v Rhinella marina	Faith's phylogenetic diversity	Dunn's test	2.91013	0.00361277	0.00867064	Benjamini Hochberg
Hemidactylus frenatus v Limnodynastes convexiusculus	Faith's phylogenetic diversity	Dunn's test	-1.92582	0.0541266	0.0927884	Benjamini Hochberg
Litoria nasuta v Rhinella marina	Faith's phylogenetic diversity	Dunn's test	1.83167	0.0670005	0.109637	Benjamini Hochberg
Carlia gracilis v Litoria nasuta	Faith's phylogenetic diversity	Dunn's test	1.75464	0.0793212	0.124155	Benjamini Hochberg
Limnodynastes convexiusculus v Lophognatus temporalis	Faith's phylogenetic diversity	Dunn's test	1.50642	0.131959	0.197939	Benjamini Hochberg
Litoria rubella v Rhinella marina	Faith's phylogenetic diversity	Dunn's test	-1.42083	0.155366	0.223728	Benjamini Hochberg
Litoria nasuta v Lophognatus temporalis	Faith's phylogenetic diversity	Dunn's test	-1.07846	0.280828	0.374438	Benjamini Hochberg
Carlia gracilis v Hemidactylus frenatus	Faith's phylogenetic diversity	Dunn's test	1.09558	0.273263	0.378364	Benjamini Hochberg
Litoria rothii v Litoria rubella	Faith's phylogenetic diversity	Dunn's test	1.00999	0.312502	0.401788	Benjamini Hochberg
Litoria caerulea v Litoria rubella	Faith's phylogenetic diversity	Dunn's test	0.958631	0.337744	0.419269	Benjamini Hochberg
Carlia gracilis v Limnodynastes convexiusculus	Faith's phylogenetic diversity	Dunn's test	-0.830243	0.406401	0.487681	Benjamini Hochberg
Hemidactylus frenatus v Litoria nasuta	Faith's phylogenetic diversity	Dunn's test	0.659059	0.509858	0.57359	Benjamini Hochberg
Carlia gracilis v Lophognatus temporalis	Faith's phylogenetic diversity	Dunn's test	0.676178	0.498928	0.5794	Benjamini Hochberg
Litoria rothii v Rhinella marina	Faith's phylogenetic diversity	Dunn's test	-0.410842	0.681188	0.700651	Benjamini Hochberg
Litoria caerulea v Rhinella marina	Faith's phylogenetic diversity	Dunn's test	-0.462197	0.64394	0.70248	Benjamini Hochberg
Hemidactylus frenatus v Lophognatus temporalis	Faith's phylogenetic diversity	Dunn's test	-0.419401	0.674923	0.714624	Benjamini Hochberg
Litoria caerulea v Litoria rothii	Faith's phylogenetic diversity	Dunn's test	-0.0513553	0.959042	0.959042	Benjamini Hochberg

## Sheet: Pairwise permanova
Comparison	Dependent variable	Test	P adjusted	P adjustment
Carlia gracilis v Hemidactylus frenatus	weighted unifrac	pairwise permanova	0.0165	Benjamini Hochberg
Carlia gracilis v Limnodynastes convexiusculus	weighted unifrac	pairwise permanova	0.0022	Benjamini Hochberg
Carlia gracilis v Litoria caerulea	weighted unifrac	pairwise permanova	0.0012	Benjamini Hochberg
Carlia gracilis v Litoria nasuta	weighted unifrac	pairwise permanova	0.0012	Benjamini Hochberg
Carlia gracilis v Litoria rothii	weighted unifrac	pairwise permanova	0.0012	Benjamini Hochberg
Carlia gracilis v Litoria rubella	weighted unifrac	pairwise permanova	0.0012	Benjamini Hochberg
Carlia gracilis v Gowidon temporalis	weighted unifrac	pairwise permanova	0.0012	Benjamini Hochberg
Carlia gracilis v Rhinella marina	weighted unifrac	pairwise permanova	0.0012	Benjamini Hochberg
Hemidactylus frenatus v Limnodynastes convexiusculus	weighted unifrac	pairwise permanova	0.0012	Benjamini Hochberg
Hemidactylus frenatus v Litoria caerulea	weighted unifrac	pairwise permanova	0.0012	Benjamini Hochberg
Hemidactylus frenatus v Litoria nasuta	weighted unifrac	pairwise permanova	0.0022	Benjamini Hochberg
Hemidactylus frenatus v Litoria rothii	weighted unifrac	pairwise permanova	0.0012	Benjamini Hochberg
Hemidactylus frenatus v Litoria rubella	weighted unifrac	pairwise permanova	0.0012	Benjamini Hochberg
Hemidactylus frenatus v Gowidon temporalis	weighted unifrac	pairwise permanova	0.0012	Benjamini Hochberg
Hemidactylus frenatus v Rhinella marina	weighted unifrac	pairwise permanova	0.0012	Benjamini Hochberg
Limnodynastes convexiusculus v Litoria caerulea	weighted unifrac	pairwise permanova	0.0012	Benjamini Hochberg
Limnodynastes convexiusculus v Litoria nasuta	weighted unifrac	pairwise permanova	0.0022	Benjamini Hochberg
Limnodynastes convexiusculus v Litoria rothii	weighted unifrac	pairwise permanova	0.0012	Benjamini Hochberg
Limnodynastes convexiusculus v Litoria rubella	weighted unifrac	pairwise permanova	0.0012	Benjamini Hochberg
Limnodynastes convexiusculus v Gowidon temporalis	weighted unifrac	pairwise permanova	0.0012	Benjamini Hochberg
Limnodynastes convexiusculus v Rhinella marina	weighted unifrac	pairwise permanova	0.0012	Benjamini Hochberg
Litoria caerulea v Litoria nasuta	weighted unifrac	pairwise permanova	0.0012	Benjamini Hochberg
Litoria caerulea v Litoria rothii	weighted unifrac	pairwise permanova	0.0012	Benjamini Hochberg
Litoria caerulea v Litoria rubella	weighted unifrac	pairwise permanova	0.0012	Benjamini Hochberg
Litoria caerulea v Gowidon temporalis	weighted unifrac	pairwise permanova	0.0012	Benjamini Hochberg
Litoria caerulea v Rhinella marina	weighted unifrac	pairwise permanova	0.0012	Benjamini Hochberg
Litoria nasuta v Litoria rothii	weighted unifrac	pairwise permanova	0.233	Benjamini Hochberg
Litoria nasuta v Litoria rubella	weighted unifrac	pairwise permanova	0.0053	Benjamini Hochberg
Litoria nasuta v Gowidon temporalis	weighted unifrac	pairwise permanova	0.0012	Benjamini Hochberg
Litoria nasuta v Rhinella marina	weighted unifrac	pairwise permanova	0.0012	Benjamini Hochberg
Litoria rothii v Litoria rubella	weighted unifrac	pairwise permanova	0.0012	Benjamini Hochberg
Litoria rothii v Gowidon temporalis	weighted unifrac	pairwise permanova	0.0012	Benjamini Hochberg
Litoria rothii v Rhinella marina	weighted unifrac	pairwise permanova	0.0012	Benjamini Hochberg
Litoria rubella v Gowidon temporalis	weighted unifrac	pairwise permanova	0.0012	Benjamini Hochberg
Litoria rubella v Rhinella marina	weighted unifrac	pairwise permanova	0.0012	Benjamini Hochberg
Gowidon temporalis v Rhinella marina	weighted unifrac	pairwise permanova	0.0012	Benjamini Hochberg
